# Supplementary material for: Visible light photocatalysis of pristine anatase TiO2 mesocrystals induced by largely exposed and stepped {001} surface
Source: Royal Society of Chemistry journal article supplement (doi:10.1039/c8gc03300e), 2019-01-01
Supplement: c8gc03300e1.pdf [file c8gc03300e1.pdf]

## **Supplementary Information**

### **Visible light photocatalysis of pristine anatase TiO<sub>2</sub> mesocrystals induced by largely-exposed and stepped (001) surface**

Jin Chen,<sup>a,c</sup> Xiaofan Li,<sup>a</sup> Bingyu Lei,<sup>a</sup> Lei Zhou<sup>\*a,b</sup> and Shenqi Wang<sup>a,b</sup>

<sup>a</sup> Department of Biomedical Engineering, School of Life Science and Technology, Huazhong University of Science and Technology, Wuhan, 430074, P. R. China

<sup>b</sup> Advanced Biomaterials and Tissue Engineering Center, Huazhong University of Science and Technology, Wuhan, 430074, P. R. China

<sup>c</sup> Key Laboratory of Biology and Medical Engineering, Guizhou Medical University, Guiyang, 550025, P. R. China

#### AUTHOR INFORMATION

#### **Corresponding Author**

\* lei.zhou.public@gmail.com

## Experimental Section

**Synthesis of  $\text{NH}_4\text{TiOF}_3$  particles:** All chemicals used in this work are analytical grade without further purification. 0.5 g CTAB was added to a freshly prepared 50 ml of solution containing  $(\text{NH}_4)_2\text{TiF}_6$  (0.3 M) and  $\text{H}_3\text{BO}_3$  (0.2 M). Stirring was stopped after the CTAB was completely dispersed. The solution was kept at 35 °C for 12 h. The collected white precipitates were cleaned and washed by consecutive centrifuging, decanting, and redispersion, in water (three times) and then in ethanol (three times).

**Synthesis of  $\text{TiO}_2$  with stepped structures:** There are two steps to prepare  $\text{TiO}_2$  with stepped structures. Firstly, the prepared  $\text{NH}_4\text{TiOF}_3$  powders were sintered at 500 °C for 30 min in air to form the less crystallized  $\text{TiO}_2$  mesocrystals. Secondly, the less crystallized  $\text{TiO}_2$  mesocrystals were sintered at 900 °C for 2 ~ 6 h in air.

**Photocatalytic experiments:** The photocatalytic activity was evaluated by the photodegradation of methylene blue (MB) in a deionized water solution with an initial concentration of 6 mg L<sup>-1</sup>. Photocatalytic experiments were carried out at 20 °C in a glass container containing 100 mg catalyst and 60 ml MB solution. The suspension solution was stirred in the dark for 1 h first in order to reach adsorption-desorption equilibrium. For visible light photocatalysis, a 300 W Xe lamp (159.2 mW cm<sup>-2</sup>) with a 420 nm cut-off filter to remove the light below 420 nm wavelengths was used as the light source. For UV light photocatalysis, an 8 W UV lamp ( $\lambda = 365$  nm, 12.7 mW cm<sup>-2</sup>) was used as the light source. For full wavelength light photocatalysis, a 300 W Xe lamp (159.2 mW cm<sup>-2</sup>) was used as the light source. For indoor light photocatalysis, a 30 W household white LED lamp (23.8 mW cm<sup>-2</sup>) was used as the light source. At the given time intervals, a small amount of the suspension was sampled and centrifuged to remove catalyst and obtain the filtrate. The concentration of MB solution was analyzed using a UV-visible-near infrared spectrophotometer (UV-1700, Macy, China).

**Characterization:** Scanning electron micrographs (SEM) and Energy dispersive X-ray analysis (EDX) were obtained using a FEI Nova Nano SEM 450 equipped with EDX analyzer. Powder X-ray diffraction (XRD) studies were performed using a PANalytical X'Pert PRO diffractometer. The average crystallite sizes were calculated using the Scherrer Equation. Atomic Force Microscope (AFM) studies were performed using a Bruker MultiMode 8. Transmission electron micrographs (TEM) were obtained using a FEI Tecnai G2 F30. Brunauer-Emmett-Teller (BET) studies were analyzed by nitrogen adsorption in a Micromeritics ASAP 2460 nitrogen adsorption apparatus. X-ray photoelectron spectra (XPS) measurements were performed using a Kratos Axis Ultra DLD. All binding energies were referenced to the C 1s peak at 284.8 eV of the surface adventitious carbon. UV-Vis absorption spectra were obtained using a PerkinElmer Lambda 35 equipped with an integrating sphere. ICP-OES analyses were performed using an Agilent ICPOES730. Carbon content was measured by infrared carbon sulfur analyzer using a LECO CS230. Nitrogen content was measured by oxygen-nitrogen analyzer using a LECO TC330. Bromine content was measured by ion chromatography using a Metrohm 881 Compact IC pro.

## Results

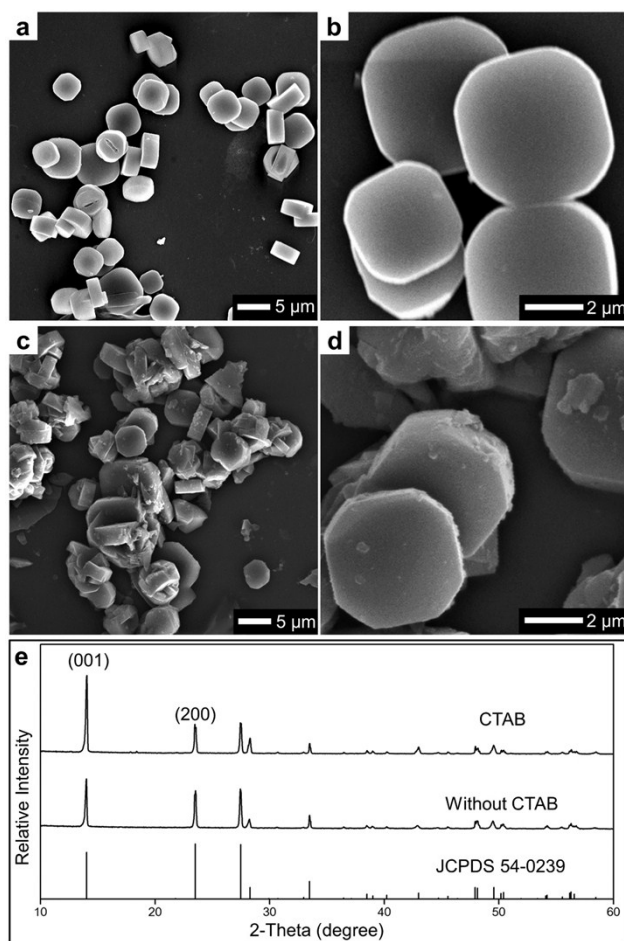

**Fig. S1** SEM images of the  $\text{NH}_4\text{TiOF}_3$  particles prepared with CTAB (a and b), and without CTAB (c and d). (e) XRD patterns of the two samples.

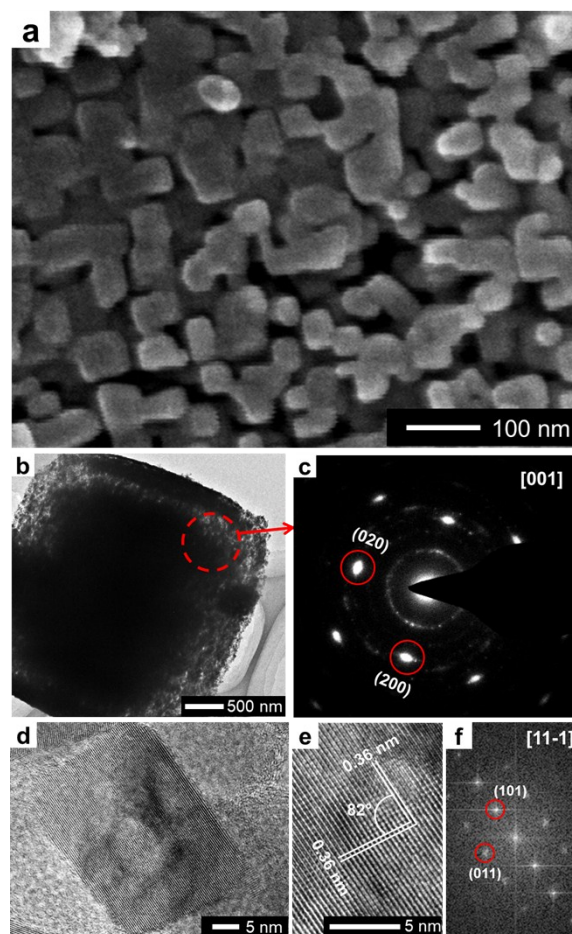

**Fig. S2** (a) Large magnification SEM image of the less crystallized  $\text{TiO}_2$  mesocrystal particles. (b and c) TEM analysis of a less crystallized  $\text{TiO}_2$  mesocrystal particle: (b) TEM image; (c) SAED pattern. (d-f) TEM analysis of a typical nanoparticle (building block) in the less crystallized  $\text{TiO}_2$  mesocrystal particle: (d) TEM image; (e) HRTEM image; (f) FFT pattern.

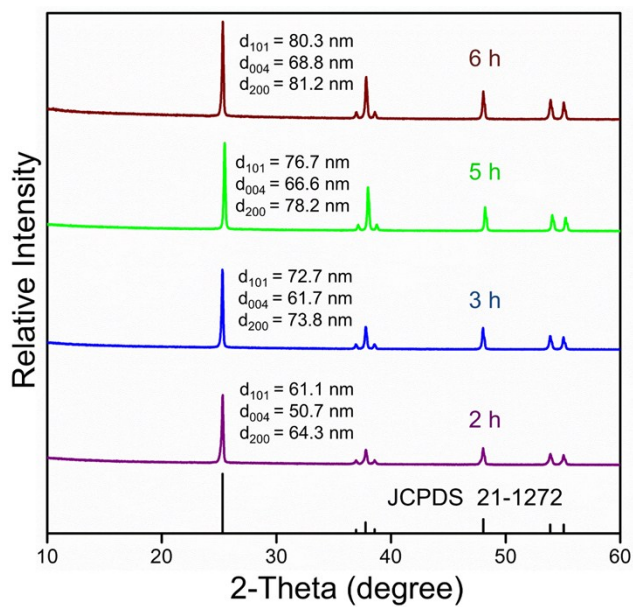

**Fig. S3** XRD patterns of the samples prepared by sintering the less crystallized TiO<sub>2</sub> mesocrystals at 900 °C for different hours.

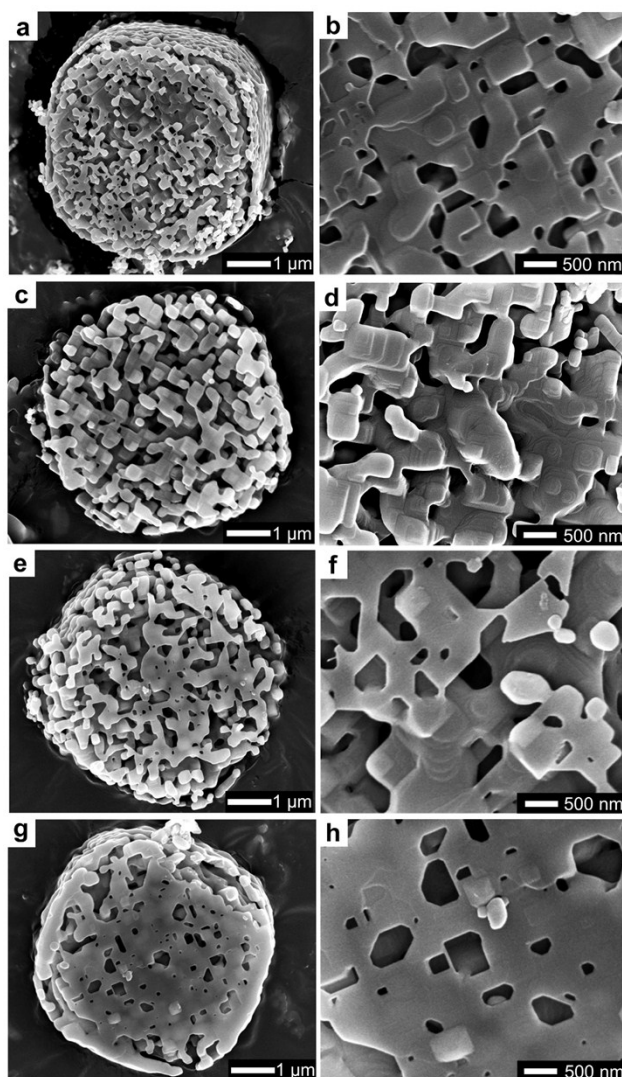

**Fig. S4** SEM images of the samples prepared by sintering the less crystallized TiO<sub>2</sub> mesocrystals at 900 °C for different hours: (a and b) 2 h; (c and d) 3 h; (e and f) 5 h; (g and h) 6 h.

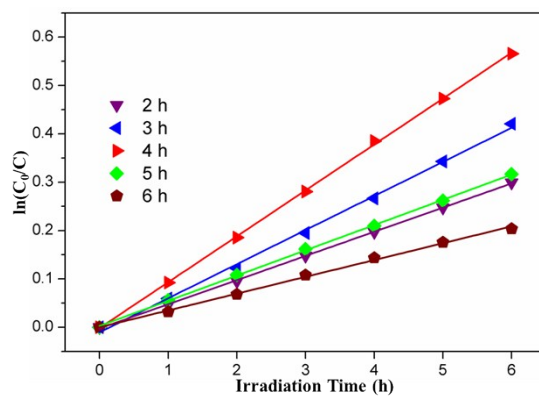

**Fig. S5** The plot of  $\ln C_0/C$  vs. time for the samples obtained by sintering the less crystallized  $\text{TiO}_2$  mesocrystals at  $900\text{ }^\circ\text{C}$  for various times. It indicates that the kinetic studies follow the first-order reaction.



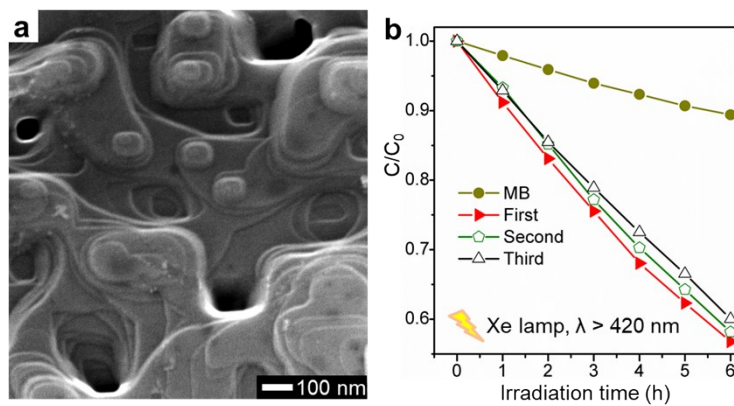

**Fig. S6** The sample prepared by sintering the less crystallized TiO<sub>2</sub> mesocrystals at 900 °C for 4 h. (a) SEM image of the sample after 6 hours of the visible light photocatalytic reaction. (b) Three cycles of visible light photocatalytic reaction of the sample.

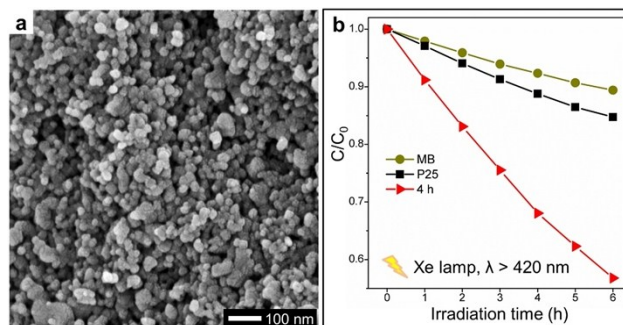

**Fig. S7** (a) SEM image of P25 powders. (b) Visible light photocatalytic activities ( $\lambda > 420$  nm) of P25 and the sample prepared by sintering the less crystallized  $\text{TiO}_2$  mesocrystals at 900 °C for 4 h.

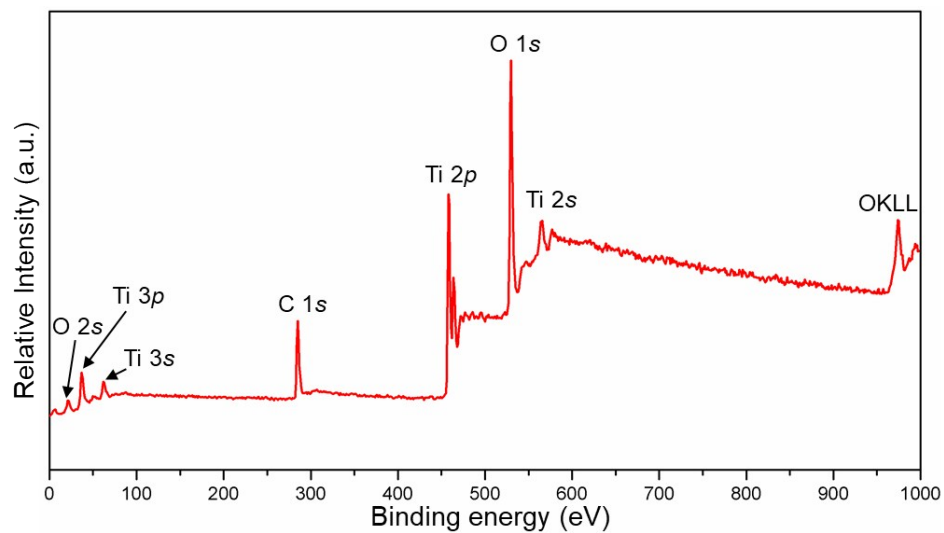

**Fig. S8** The XPS full spectrum of the sample obtained by sintering the less crystallized TiO<sub>2</sub> mesocrystals at 900 °C for 4 h.

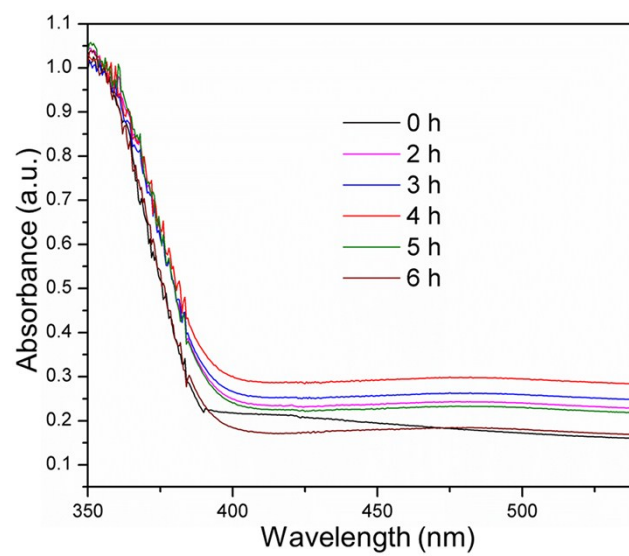

**Fig. S9** UV-Vis absorption spectra of samples obtained by sintering the less crystallized TiO<sub>2</sub> mesocrystals at 900 °C for various hours.

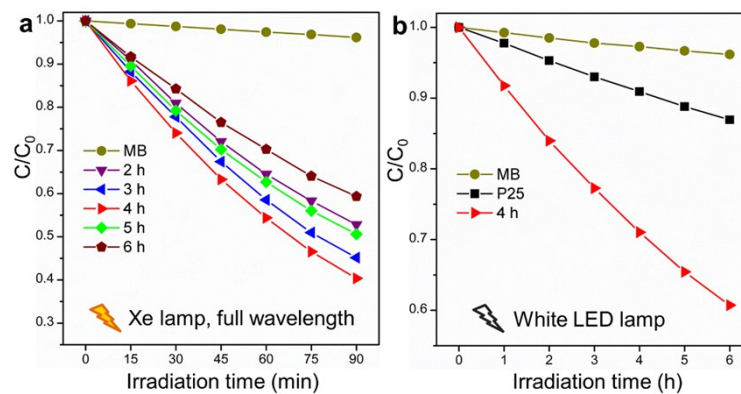

**Fig. S10** (a) Full wavelength light photocatalytic activities of the samples prepared by sintering the less crystallized TiO<sub>2</sub> mesocrystals at 900 °C for different hours. (b) White LED light photocatalytic activities of P25 and the sample prepared by sintering the less crystallized TiO<sub>2</sub> mesocrystals at 900 °C for 4 h.

| Sample | $S_{\text{BET}}$ ( $\text{m}^2 \text{g}^{-1}$ ) |
|--------|-------------------------------------------------|
| P25    | $53.6 \pm 2.1$                                  |
| 2 h    | $7.8 \pm 0.7$                                   |
| 3 h    | $7.6 \pm 0.5$                                   |
| 4 h    | $7.3 \pm 0.7$                                   |
| 5 h    | $7.3 \pm 0.6$                                   |
| 6 h    | $7.3 \pm 0.4$                                   |

**Table S1** Specific surface areas ( $S_{\text{BET}}$ ) of P25 and the samples obtained by sintering the less crystallized  $\text{TiO}_2$  mesocrystals at 900 °C for different hours,  $S_{\text{BET}}$  were calculated using BET results.

| Sample | F (at%) | N (at%) |
|--------|---------|---------|
| 700 °C | 0.28    | 0.11    |
| 800 °C | 0.15    | 0.07    |
| 900 °C | < 0.01  | < 0.01  |

**Table S2** F and N atomic concentration of the samples prepared by sintering the less crystallized TiO<sub>2</sub> mesocrystals at 700 °C, 800 °C and 900 °C for 2 h. Atomic concentrations were calculated using XPS spectra.

| Sample | F (wt%) | N (wt%) | C (wt%) | B (wt%) | Br (wt%) |
|--------|---------|---------|---------|---------|----------|
| 0 h    | 1.55    | 1.21    | 1.37    | 0.00    | 0.00     |
| 2 h    | 0.00    | 0.00    | 1.25    | 0.00    | 0.00     |
| 3 h    | 0.00    | 0.00    | 1.15    | 0.00    | 0.00     |
| 4 h    | 0.00    | 0.00    | 1.16    | 0.00    | 0.00     |
| 5 h    | 0.00    | 0.00    | 1.33    | 0.00    | 0.00     |
| 6 h    | 0.00    | 0.00    | 1.12    | 0.00    | 0.00     |

**Table S3** Element concentrations of the samples prepared by sintering the less crystallized TiO<sub>2</sub> mesocrystals at 900 °C for different hours, element concentrations were calculated using EDX results.



| Sample | N (wt%)              | C (wt%) | B (wt%)               | Br (wt%) |
|--------|----------------------|---------|-----------------------|----------|
| 0 h    | 0.129                | 0.065   | $1.01 \times 10^{-3}$ | < 0.001  |
| 2 h    | $4.2 \times 10^{-3}$ | 0.057   | $0.93 \times 10^{-3}$ | < 0.001  |
| 3 h    | $3.4 \times 10^{-3}$ | 0.058   | $1.05 \times 10^{-3}$ | < 0.001  |
| 4 h    | $2.9 \times 10^{-3}$ | 0.049   | $0.84 \times 10^{-3}$ | < 0.001  |
| 5 h    | $2.7 \times 10^{-3}$ | 0.044   | $0.78 \times 10^{-3}$ | < 0.001  |
| 6 h    | $3.1 \times 10^{-3}$ | 0.048   | $0.86 \times 10^{-3}$ | < 0.001  |

**Table S4** Results of element analysis of the samples prepared by sintering the less crystallized TiO<sub>2</sub> mesocrystals at 900 °C for different hours. N content was measured by oxygen-nitrogen analyzer. C content was measured by Infrared Carbon Sulfur Analyzer. B contents was measured by ICP-OES. Br content was measured by ion chromatography.
